# Supplementary material for: The pseudogene PRELID1P6 promotes glioma progression via the hnHNPH1-Akt/mTOR axis
Source: PubMed Central journal article supplement (PMC8249232; doi:10.1038/s41388-021-01854-x), 2021-06-09
Supplement: 41388_2021_1854_MOESM5_ESM.pdf [file 41388_2021_1854_MOESM5_ESM.pdf]

## **Supplementary figure and table**

### **Supplementary figure 1. The characteristics and expression of PRELID1P6**

(A) Location of PRELID1P6, chromosome 2p15. (B) Prediction of protein-coding ability of PRELID1P6 by Coding Potential Calculator.

**Supplementary figure 2. Overexpression of PRELID1P6 significantly increased the *in vitro* and *in vivo* proliferation of glioma cells.**

(A, B, C). Xenograft tumor formation of U251 cells with PRELID1P6 overexpression in nude mice. Growth rates, tumor weights were significantly increased compared to the control group.

**Supplementary figure 3. PRELID1P6 did not interact with other RNA binding protein identified by MS.**

(A) The protein level of hnRNPUL1, hnRNPH3 and DDX58 did not change after PRELID1P6 knockdown in U251 and U373 glioma cells. (B) The mRNA level of hnRNPUL1, hnRNPH3 and DDX58 did not change after PRELID1P6 knockdown in U251 and U373 glioma cells. (C) IP assay using hnRNPUL1, hnRNPH3 and DDX58 antibody did not pulldown PRELID1P6.

**Supplementary figure 4. The secondary structure of PRELID1P6**

The secondary structures as predicted by RNAfold

**Supplementary Table 1. List of PRELID1P6-interacting proteins identified by Mass Spectrometry**

| Gene name | Protein name                                                | Mass   | #1<br>score | #2<br>score | #3<br>score |
|-----------|-------------------------------------------------------------|--------|-------------|-------------|-------------|
| HNRNPH1   | Heterogeneous nuclear ribonucleoprotein H                   | 49484  | 280         | 201         | 218         |
| DDX58     | Probable ATP-dependent RNA helicase DDX58                   | 108014 | 180         | 70          | 156         |
| ETFA      | Electron transfer flavoprotein subunit alpha, mitochondrial | 35400  | 127         | 34          | 61          |
| SEPT11    | Septin-11                                                   | 49652  | 118         | 89          | 83          |
| HNRNPUL1  | Heterogeneous nuclear ribonucleoprotein U-like protein 1    | 96250  | 95          | 62          | 36          |
| HPRT1     | Hypoxanthine-guanine phosphoribosyltransferase              | 24792  | 91          | 32          | 55          |
| RAB2A     | Ras-related protein Rab-2A                                  | 23702  | 90          | 76          | 87          |
| HNRNPH3   | Heterogeneous nuclear ribonucleoprotein H3                  | 36960  | 89          | 64          | 35          |
| RRM2      | Ribonucleoside-diphosphatereductase subunit M2              | 45134  | 86          | 51          | 51          |
| ACTR3     | Actin-related protein 3                                     | 47797  | 80          | 42          | 34          |

**Supplementary Table 2. Sequences of primers, shRNA and siRNA used for in this study**

---

Sequences of primers and probes for qPCR

---

PRELID1P6 F: 5'- AACAGCGGCTGGACTGAAAT-3'

PRELID1P6 R: 5'- TCACGTTGCTTTTGAAGTGGG-3'

U6 F: 5'-CTCGCTTCGGCAGCACA-3'

U6 R: 5'-AACGCTTCACGAATTTGCGT-3'

hGAPDH F: 5'- ACCACAGTCCATGCCATCAC -3'

hGAPDH R: 5'- CACCACCCTGTTGCTGTAGCC -3'

hnRNPH1 F: 5'-ATTCAAATGGGGCTCAAGGTAT -3'

hnRNPH1 R: 5'-GTGTCAGGACTATTTGGACCAG-3'

siPRELID1P6#1: CTGGGCCAAGCAACTATTT

siPRELID1P6#2: GAATGCCACGCTGGGCCAA

sihnRNPH1#1: GGAGCTGGCTTTGAGAGGA

sihnRNPH1#2: GCATACTGGTCCAAATAGT

hAkt F: AGCGACGTGGCTATTGTGAAG

hAkt R: GCCATCATTCTTGAGGAGGAAGT

hmTOR F: ATGCTTGGAACCGGACCTG

hmTOR R: TCTTGACTCATCTCTCGGAGTT

hp70S6k F: CGGGACGGCTTTTACCCAG

hp70S6k R: TTTCTCACAATGTTCCATGCCA

---

**Supplementary Table 3. List of antibodies used in western blot, immunoprecipitation analysis**

| Antibody                                  | Vendor         | Catalog No | Application                     |
|-------------------------------------------|----------------|------------|---------------------------------|
| Rabbit anti-hnRNPH1                       | Abcam          | Ab10374    | WB,1:5000; IP, 6µg/mg of lysate |
| Rabbit anti-human Atk                     | Cell Signaling | 4691       | WB, 1:1000                      |
| Rabbit anti-human Phospho-Akt (Ser473)    | Cell Signaling | 4060       | WB, 1:1000                      |
| Rabbit anti-human Phospho-Akt (Thr308)    | Cell Signaling | 13038      | WB, 1:1000                      |
| Rabbit anti-human mTOR                    | Cell Signaling | 2983       | WB, 1:1000                      |
| Rabbit anti-human Phospho-mTOR (Ser2448)  | Cell Signaling | 5536       | WB, 1:1000                      |
| Rabbit anti-human p70 S6K                 | Cell Signaling | 2708       | WB, 1:1000                      |
| Rabbit anti-human Phospho-p70 S6K(Ser371) | Cell Signaling | 9208       | WB, 1:1000                      |
| Rabbit anti-human 4E-BP1                  | Cell Signaling | 9644       | WB, 1:1000                      |
| Rabbit anti-human Phospho-4E-BP1(Ser65)   | Cell Signaling | 9451       | WB, 1:1000                      |
| Mouse anti-human Ubiquitin                | Cell Signaling | 3936       | WB, 1:1000                      |
| Mouse anti-human GAPDH                    | Proteintech    | 60004-1    | WB, 1:1000                      |
| Mouse anti-human TRF2                     | Santa scruze   | sc-271710  | WB, 1:1000                      |
| Mouse anti-human hnRNPUL1                 | Santa scruze   | sc-393975  | WB, 1:1000                      |
| Mouse anti-human hnRNPH3                  | Santa scruze   | sc-376416  | WB, 1:1000                      |
| Rabbit anti-human DDX58                   | Abcam          | ab180675   | WB, 1:1000                      |
